# Supplementary material for: Multi-functional hybrid materials for proton conductivity
Source: Royal Society of Chemistry journal article supplement (doi:10.1039/c2nj40017k), 2012-01-01

## Electronic Supplementary Information

### Multi-functional Hybrid Materials for Proton Conductivity

Ajfane Cheik Ibrahim,<sup>a</sup> Sabine Devautour-Vinot,<sup>b</sup> Daoud Naoufal<sup>c</sup> and Ahmad Mehdi<sup>a\*</sup>

<sup>a</sup>Institut Charles Gerhardt, UMR 5253, Chimie Moléculaire et Organisation du Solide, Place Eugène Bataillon, 34095 Montpellier Cedex 5, France E-mail: [ahmad.mehdi@um2.fr](mailto:ahmad.mehdi@um2.fr)

<sup>b</sup>Institut Charles Gerhardt, UMR 5253, Dynamique et Adsorption dans les Matériaux Poreux, Place Eugène Bataillon, 34095 Montpellier  
<sup>c</sup>Laboratoire de Chimie de Coordination Inorganique et Organométallique, Université Libanaise, Faculté des Sciences (I), Hadath, Liban

#### ESI1 <sup>29</sup>Si CP-MAS NMR spectra of M-SH<sup>y</sup>

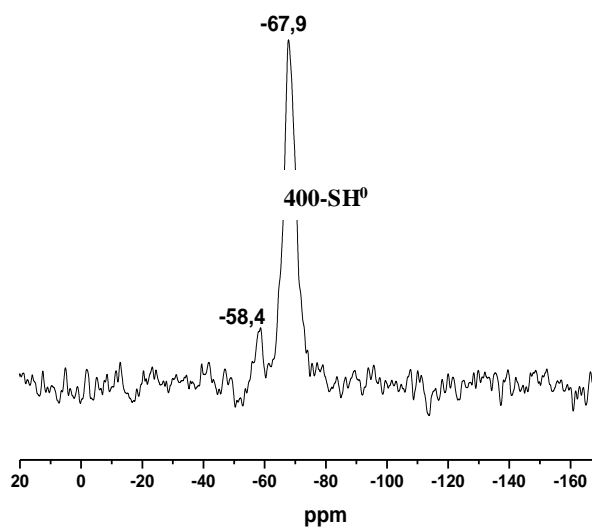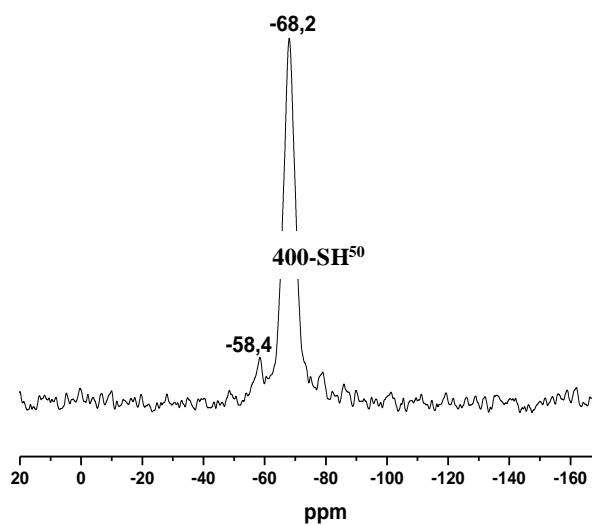

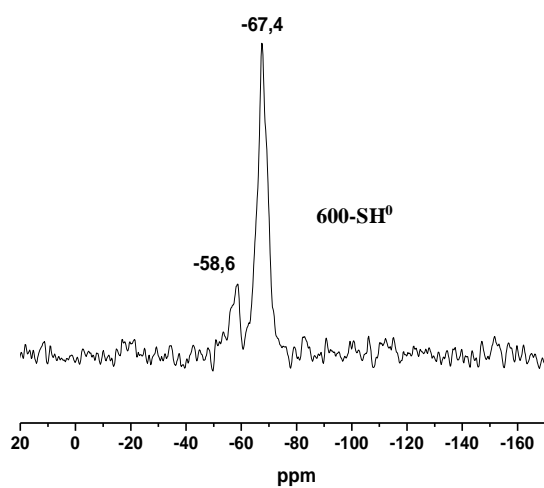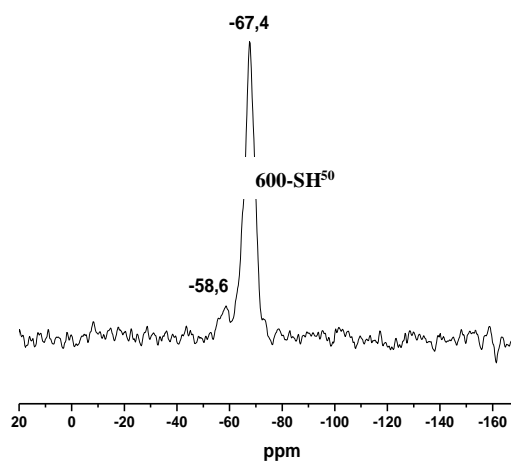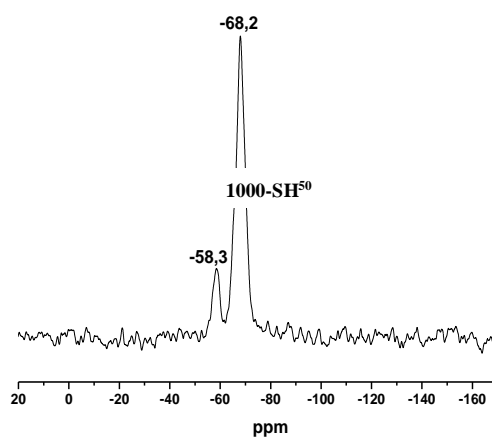

## ESI2 $^{13}\text{C}$ CP-MAS NMR spectra of $\text{M-SH}^y$

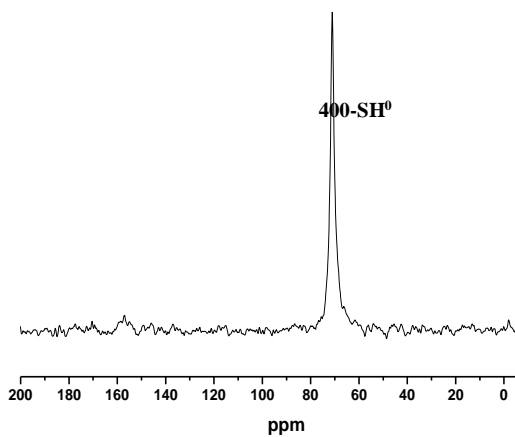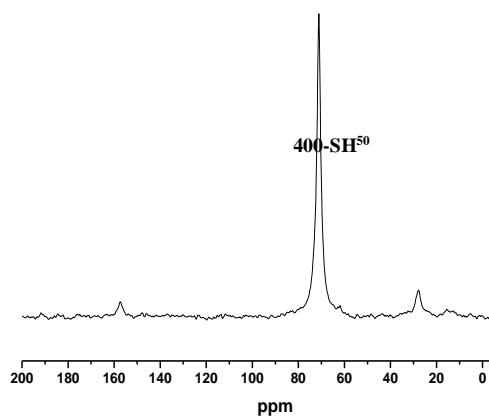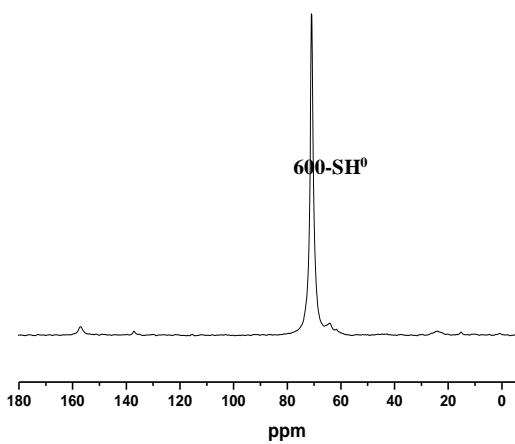

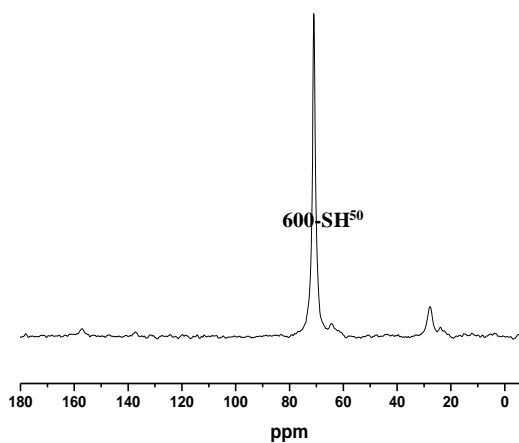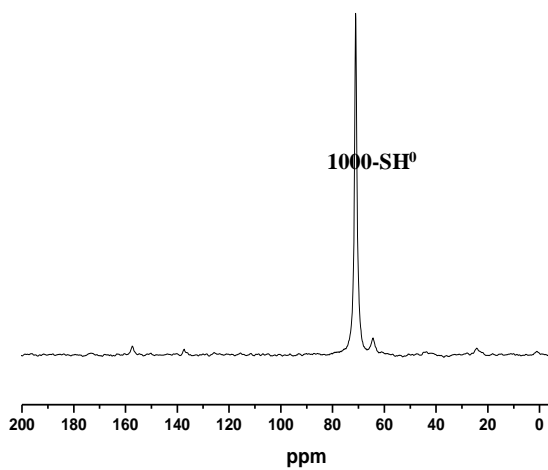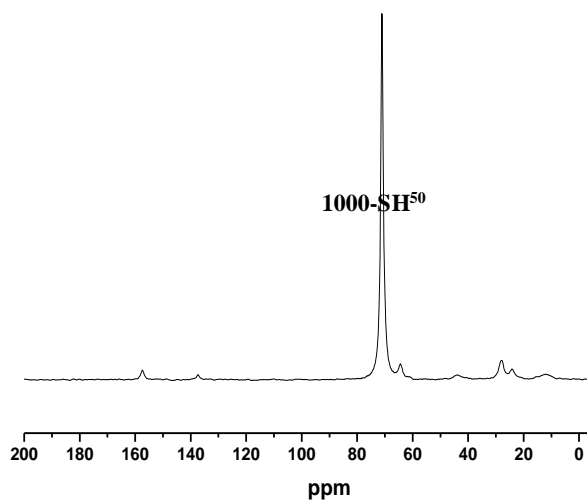

Supplement: c2nj40017k.pdf [file c2nj40017k.pdf]
